# Supplementary material for: Weight-related changes in MRI-derived measures of body composition and liver steatosis: a large-scale analysis for obesity trial design
Source: Research Square preprint supplement (doi:10.21203/rs.3.rs-6656623/v1), 2025-05-21
Supplement: Supplementary file 1 [file 093dabc56ae028770b32835b.xlsx]

## Sheet: Sheet1
	All	Controls with	Weight loss	P	Weight gain	P
	individuals1	stable weight1	(WL) group1	Control vs.	(WG) group1	Control vs. WG group2
	N = 3071	N = 1,333	N = 874	WL group2	N = 864
Demographics
Age	63 (7)	63 (7)	64 (7)	0.47	61 (7)	<0.001
Sex (% male)	1,495 (49%)	683 (51%)	420 (48%)	0.14	392 (45%)	0.007
Ethnicity (% White British)	2,976 (97%)	1,290 (97%)	854 (98%)	0.18	832 (96%)	0.55
Current smoking (%)	155 (5%)	51 (4%)	51 (6%)	0.03	53 (6%)	0.02
Alcohol intake frequency (%)
Once or more per week	2,301 (75%)	1,027 (77%)	660 (76%)	0.4	614 (71%)	0.002
Metabolic comorbidities
BMI (kg/m2)	26.3 (4)	25.9 (3.8)	27.0 (4.2)	<0.001	26.1 (4.0)	<0.001
BMI categories				<0.001		0.23
Lean (<25)	1,274 (43%)	578 (45%)	314 (38%)		382 (45%)
Overweight (≥25 and <30)	1,279 (43%)	569 (44%)	367 (45%)		343 (41%)
Obese (≥30)	389 (13%)	139 (11%)	139 (17%)		111 (13%)
Waist circumference (WC) (cm)	88 (12)	87 (12)	91 (12)	<0.001	87 (12)	0.43
Triglycerides (mmol/L)	1.6 (0.9)	1.6 (0.9)	1.7 (1.0)	0.06	1.6 (0.9)	0.9
Total cholesterol (mmol/L)	5.8 (1.0)	5.8 (1.1)	5.8 (1.1)	0.69	5.7 (1.0)	0.07
High WC3	710 (23%)	262 (20%)	261 (30%)	<0.001	187 (22%)	0.26
Metabolic syndrome	353 (15%)	138 (14%)	105 (16%)	0.15	110 (16%)	0.19
T2D status	163 (5.3%)	70 (5%)	49 (6%)	0.79	44 (5.1%)	0.92
Hyperlipidemia	681(22%)	279(21%)	219 (25%)	0.02	183(21%)	0.88
Lipid lowering medications	427 (14%)	184 (14%)	130 (15%)	0.48	113 (13%)	0.62
Hypertension medications	385 (13%)	161 (12%)	121 (14%)	0.23	103 (12%)	0.91
Physical activity
MET (hours/week)
Walking	19 (18)	19 (17)	19 (17)	0.66	21 (20)	0.003
Moderate	17 (19)	17 (19)	17 (19)	0.7	17 (20)	0.78
Vigorous	13 (19)	13 (17)	13 (19)	0.91	14 (22)	0.44
Other medical conditions
Cancer diagnosis	54 (1.8%)	22 (1.7%)	18 (2.1%)	0.5	14 (1.6%)	>0.9
Socioeconomic status
Townsend deprivation index	-1.9 (2.7)	-2.0 (2.6)	-2.0 (2.7)	0.9	-1.7 (2.8)	0.04
Liver MRI metrics
Liver fat (%)	4.8 (4.4)	4.7 (4.4)	5.2 (4.8)	0.004	4.5 (4.0)	0.27
MASLD (%)	644 (21%)	268(20%)	211 (24%)	0.022	165 (19%)	0.6
Body composition MRI metrics
VAT (L)	3.6 (2.2)	3.5 (2.2)	3.9 (2.3)	<0.001	3.3 (2.0)	0.06
SAT (L)	6.6 (3.0)	6.3 (2.9)	7.0 (3.3)	<0.001	6.6 (3.0)	0.03
Abdominal SM (L)	5.6 (1.3)	5.7 (1.3)	5.7 (1.3)	0.62	5.6 (1.3)	0.08
SMI (L/m2)	1.9 (0.3)	1.9 (0.3)	1.9 (0.3)	0.23	1.9 (0.3)	0.44
MFISM (%)	15.4 (2.5)	15.2 (2.5)	15.6 (2.6)	<0.001	15.3 (2.5)	0.64
Psoas CSA (cm2)	16.5 (5.7)	16.8 (5.7)	16.6 (5.7)	0.57	16.2 (5.7)	0.02
1 Data are mean (SD) or N (%).
2 P values calculated using Welch two sample t-test or Fisher's exact test.
3 High WC threshold was ≥102 cm in males and ≥90 cm in females.
