# Supplementary material for: Weight-related changes in MRI-derived measures of body composition and liver steatosis: a large-scale analysis for obesity trial design
Source: Research Square preprint supplement (doi:10.21203/rs.3.rs-6656623/v1), 2025-05-21
Supplement: Supplementary file 1 [file d49898c80add583c1e2527b6.pdf]

# Weight-related changes in MRI-derived measures of body composition and liver steatosis: a large-scale analysis for obesity trial design

|                          | Legend                                                                                                                                                                                                                                                                                                                               | Page |
|--------------------------|--------------------------------------------------------------------------------------------------------------------------------------------------------------------------------------------------------------------------------------------------------------------------------------------------------------------------------------|------|
| Supplementary Methods    |                                                                                                                                                                                                                                                                                                                                      | 2    |
| Supplementary Figure 1   | Correlations between MRI body composition metrics at baseline. The matrix displays Spearman's correlation coefficients with color intensity indicating strength and direction. Asterisks below each value denote statistical significance after FDR correction (*p<0.05, **p<0.01, ***p<0.001).                                      | 5    |
| Supplementary Figure 2   | Correlations between relative % change in MRI body composition metrics during the follow-up period. The matrix displays Spearman's correlation coefficients with color intensity indicating strength and direction. Asterisks below each value denote statistical significance after FDR correction (*p<0.05, **p<0.01, ***p<0.001). | 6    |
| Supplementary Figure 3   | Correlations between MRI-derived abdominal skeletal muscle (SM) volume and DXA-derived trunk lean mass (A) and total lean mass (B) at baseline across the whole cohort.                                                                                                                                                              | 7    |
| Supplementary Table 1    | Absolute change in MRI metrics across the whole cohort and individuals whose weight remained stable, who lost weight or gained weight over the follow-up period.                                                                                                                                                                     | 8    |
| Supplementary Table 2    | Relative change in MRI metrics across individuals who were not on medications for hypertension and whose weight remained stable, who lost weight or gained weight over the follow-up period.                                                                                                                                         | 9    |
| Supplementary Table 3    | Relative change in MRI metrics in males whose weight remained stable, who lost weight or gained weight over the follow-up period.                                                                                                                                                                                                    | 10   |
| Supplementary Table 4    | Relative change in MRI metrics in females whose weight remained stable, who lost weight or gained weight over the follow-up period.                                                                                                                                                                                                  | 11   |
| Supplementary Table 5    | Expected changes per each 5% weight reduction in individuals with overweight or obesity based on linear regression analysis.                                                                                                                                                                                                         | 12   |
| Supplementary References |                                                                                                                                                                                                                                                                                                                                      | 13   |

6

## 7 **Supplementary Methods**

### 8 **Data collection**

#### 9 *Clinical and biochemical data*

10 Prior history of diabetes, hypertension, recent cancer (within 2 years of imaging visit) and self-  
11 reported medications, were collected at the imaging visits. From hospitalisation data, primary  
12 care data and self-reports, diabetes was defined as ICD-10 E11 and E14. Hypertension  
13 defined as ICD-10 I10. From hospitalisation data, cancer was defined as ICD-10: C00-C97,  
14 D00-D09; ICD-9: 140-208, 230-234.

15

### 16 **Body composition measurements from MRI**

#### 17 *Data preprocessing of body composition measurements from MRI*

18 Body composition measurements were derived using fully automated volumetric and  
19 semi-automated single-slice area analyses at the 3rd lumbar vertebra (L3) level, as described  
20 previously <sup>1</sup>. For each Dixon 3D SPGR water/fat volume pair, signal fat fraction (SFF) was  
21 calculated by, firstly correcting scanner-derived fat and water on a voxel-wise basis to remove  
22 bias introduced by the difference in T1 relaxation times <sup>2</sup>. Correction factors used T1 values  
23 of 1042 ms for water (representing muscle) and 385 ms for fat <sup>3,4</sup>. Secondly, the value of each  
24 voxel was computed as the fraction of the corrected fat signal relative to the sum of the  
25 corrected water and fat signals in that voxel.

26 Each set of water, fat and SFF volumes underwent a trilinear resampling to output a  
27 consistent voxel resolution of 2x2x3 mm, where 3mm was the resolution along the inferior-  
28 superior axis. N4 bias correction <sup>5</sup> was applied to fat and water volumes.

29 For each image type a unique whole-body space was created to extend all volumes into  
30 a single matrix. Individual volumes were sequentially added to this space from the most inferior  
31 to the most superior volume. If there was an overlap when adding a new volume, overlapping

voxel values were calculated as a weighted mean of the values from each overlapping volume, where the weighting is based on the distances between the voxel and the edge of the overlapping volumes. Signal intensity between adjacent volumes was normalized by mapping the histogram of the more inferior block to the one of the adjacent superior block. The mapping was applied to the inferior block to ensure a consistent contrast across the whole-body. This process was repeated until all volumes were contained within the whole-body volume. N4 and signal normalization was not applied to SFF volumes to avoid bias in tissue characterization.

#### *Abdominal volumetric analysis of body composition measurements from MRI*

For volumetric analysis, the region from the center of the T9 vertebra to the top of the lower of the two femoral heads was selected. To automatically identify the region limits, vertebrae and femurs were segmented in the whole-body fat volume using a nnU-Net<sup>6</sup>. Each independent vertebra was given a unique label from inferior to superior, starting with L5 upwards. Each femur was given a unique label, and the top of the lower femoral head was identified as the more inferior of the highest labelled slice for the two femurs. The identified slices were used to crop the fat, water and SFF volumes to the analysis region. The cropped fat and water volumes were then used as input to a 3D neural network that segmented SAT, muscle tissue, internal cavity, and bone.

The dataset included instances of fat-water swapping, which would negatively impact the fat fraction calculation, segmentation performance, and metric accuracy. Cases with fat swaps were detected using a ResNet<sup>7</sup> and manually corrected by re-labelling the affected blocks before the whole-body volume creation, avoiding swap artefacts.

#### *Single-slice cross-sectional area analysis of body composition measurements from MRI*

For single-slice analysis, axial slices passing through the centre of mass of the L3 vertebra were automatically extracted from the whole-body volumes for measurement. We applied a

neural network model, different from the one used in the volumetric analysis, that segmented all vertebrae within the volume as a single vertebrae class. Morphological operations were used subsequently to label individual vertebra, identifying the L3 counting vertebrae from the sacrum upwards. Within the extracted axial slice at the centre of L3 vertebra, ROI were segmented with two sequential neural networks. Firstly, a U-Net classified voxels into eight classes: SAT, abdominal cavity, and abdominal SM (including coarse segmentations of the right and left back muscles, right and left psoas muscles, and abdominal wall muscles). Secondly, an additional U-Net was applied to a focused sub-region of the image, refining psoas segmentations.

Two rounds of manual quality control (QC) were performed. The first QC step assessed the L3 centre of mass placement, rejecting cases where L3 was poorly visible or repositioning the landmark as needed. The second QC step involved a visual review of every 2D axial segmentation at the centre of L3, rejecting cases with segmentation errors or unclear tissue boundaries.

#### *Extraction of body composition measurements from MRI*

Fat and muscle tissues were quantified by filtering segmented voxels based on SFF values. Fat tissue was defined as having SFF values  $\geq 0.5$ , and muscle tissue as having SFF values  $< 0.5$ , ensuring that any over-segmented voxels from adjacent tissues were excluded. Volume and cross sectional area (CSA) metrics were calculated based on the number of voxels and pixels, respectively. MFI was computed as the mean SFF value of the muscle tissue voxels.

#### **Statistical analysis**

Individuals with weight changes exceeding 15% in either direction were excluded from group analyses, as this combined category ( $>15\%$  weight gain or loss) comprised only 42 participants in total, providing insufficient sample size for statistical comparisons.

**Supplementary Figure 1.** Correlations between MRI body composition metrics at baseline. The matrix displays Spearman's correlation coefficients with color intensity indicating strength and direction. Asterisks below each value denote statistical significance after FDR correction (\*p<0.05, \*\*p<0.01, \*\*\*p<0.001).

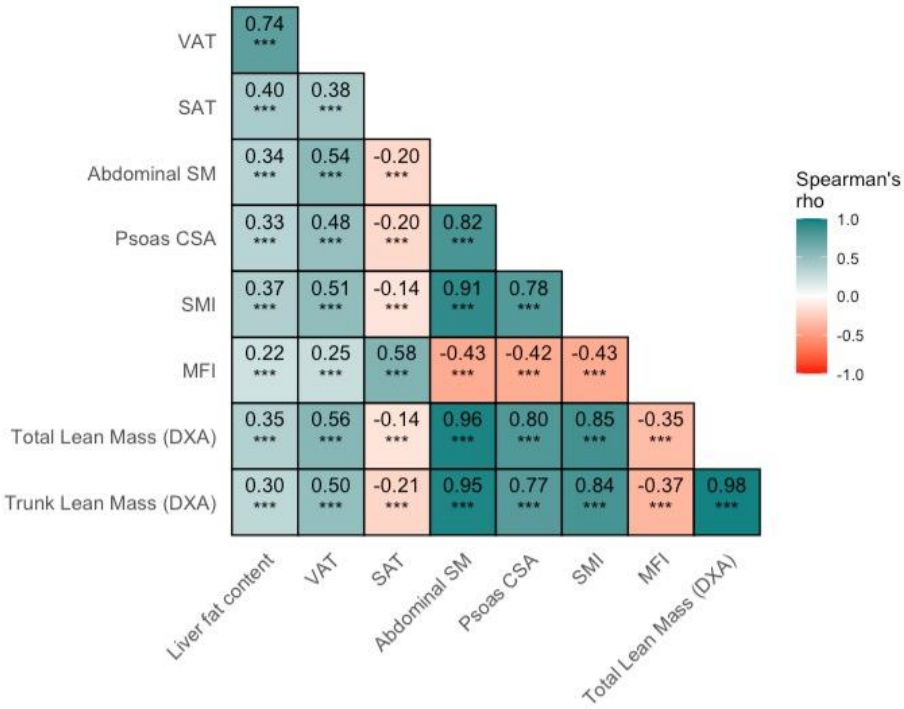

**Supplementary Figure 2.** Correlations between relative % change in MRI body composition metrics during the follow-up period. The matrix displays Spearman's correlation coefficients with color intensity indicating strength and direction. Asterisks below each value denote statistical significance after FDR correction (\*p<0.05, \*\*p<0.01, \*\*\*p<0.001).

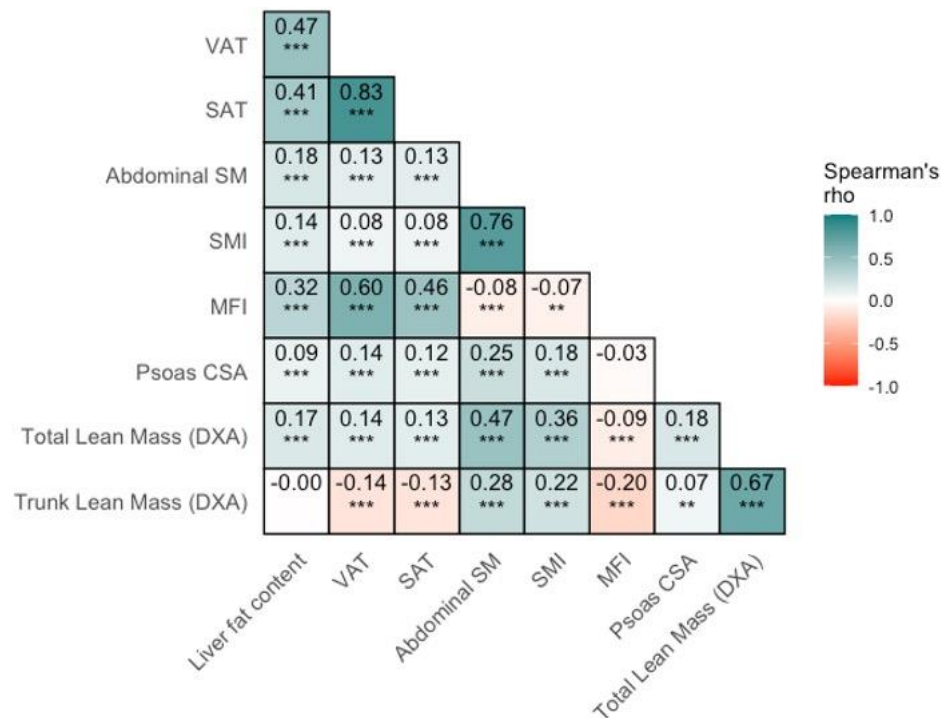

**Supplementary Figure 3.** Correlations between MRI-derived abdominal skeletal muscle (SM) volume and DXA-derived trunk lean mass (A) and total lean mass (B) at baseline across the whole cohort.

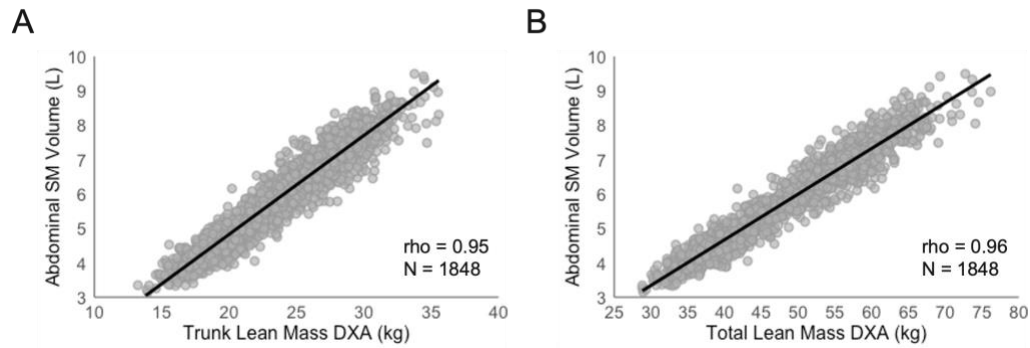

103 **Supplementary Table 1.** Absolute change in MRI metrics across the whole cohort and individuals whose weight remained stable, who lost  
104 weight or gained weight over the follow-up.

105

|                              |                          |                          |                          | 2-5%                     | Controls            | 2-5%         | 5-10%                    | 10-15%                   | ANOVA p-                |
|------------------------------|--------------------------|--------------------------|--------------------------|--------------------------|---------------------|--------------|--------------------------|--------------------------|-------------------------|
|                              | All                      | 10-15%                   | 5-10%                    | weight loss <sup>1</sup> | with                | weight gain  | weight gain <sup>1</sup> | weight gain <sup>1</sup> | value across            |
| Change                       | individuals <sup>1</sup> | weight loss <sup>1</sup> | weight loss <sup>1</sup> | N = 538                  | stable              | N = 577      | N = 227                  | N = 44                   | all groups <sup>2</sup> |
|                              | N = 3,029                | N = 55                   | N = 255                  |                          | weight <sup>1</sup> |              |                          |                          |                         |
|                              |                          |                          |                          |                          | N = 1,333           |              |                          |                          |                         |
| Liver                        |                          |                          |                          |                          |                     |              |                          |                          |                         |
| Liver fat (%)                | 0.09 (2.70)              | -3.23 (4.49)             | -1.76 (3.03)             | -0.73 (2.05)             | 0.07 (2.08)         | 0.96 (2.41)  | 2.19 (3.33)              | 3.45 (4.84)              | <0.001                  |
| Body composition             |                          |                          |                          |                          |                     |              |                          |                          |                         |
| VAT (L)                      | 0.10 (0.64)              | -1.51 (0.90)             | -0.80 (0.56)             | -0.27 (0.36)             | 0.14 (0.34)         | 0.52 (0.38)  | 0.90 (0.61)              | 1.22 (0.60)              | <0.001                  |
| SAT (L)                      | 0.06 (0.83)              | -2.23 (0.76)             | -1.13 (0.62)             | -0.42 (0.44)             | 0.09 (0.41)         | 0.59 (0.46)  | 1.13 (0.71)              | 2.07 (0.77)              | <0.001                  |
| Abdominal SM (L)             | -0.08 (0.21)             | -0.26 (0.31)             | -0.19 (0.23)             | -0.14 (0.20)             | -0.07 (0.19)        | -0.02 (0.19) | 0.03 (0.21)              | 0.07 (0.23)              | <0.001                  |
| SMI (L/m <sup>2</sup> )      | -0.02 (0.09)             | -0.08 (0.11)             | -0.05 (0.09)             | -0.04 (0.09)             | -0.02 (0.08)        | -0.01 (0.09) | 0.01 (0.10)              | 0.03 (0.11)              | <0.001                  |
| MFI <sub>SM</sub> (%)        | 0.39 (0.58)              | -0.57 (0.84)             | -0.08 (0.58)             | 0.18 (0.50)              | 0.40 (0.47)         | 0.61 (0.51)  | 0.86 (0.62)              | 1.14 (0.61)              | <0.001                  |
| Psoas CSA (cm <sup>2</sup> ) | -0.29 (2.51)             | -0.98 (2.87)             | -0.87 (2.14)             | -0.57 (2.64)             | -0.31 (2.55)        | 0.05 (2.33)  | 0.39 (2.61)              | 0.17 (1.69)              | <0.001                  |

106

107 <sup>1</sup> Data are mean (SD).

108 <sup>2</sup> P-values calculated using ANOVA test.



109 **Supplementary Table 2.** Relative change in MRI metrics across individuals who were not on medications for hypertension and whose weight  
110 remained stable, who lost weight or gained weight over 3-year follow-up.

111

|                       |                          |                          |                          | 2-5%                     | Controls            | 2-5%        | 5-10%                    | 10-15%                   | ANOVA p-                |
|-----------------------|--------------------------|--------------------------|--------------------------|--------------------------|---------------------|-------------|--------------------------|--------------------------|-------------------------|
|                       | All                      | 10-15%                   | 5-10%                    | weight loss <sup>1</sup> | with                | weight gain | weight gain <sup>1</sup> | weight gain <sup>1</sup> | value across            |
| Change                | individuals <sup>1</sup> | weight loss <sup>1</sup> | weight loss <sup>1</sup> | N = 461                  | stable              | N = 502     | N = 200                  | N = 44                   | all groups <sup>2</sup> |
|                       | N = 2,648                | N = 50                   | N = 219                  |                          | weight <sup>1</sup> |             |                          |                          |                         |
|                       |                          |                          |                          |                          | N = 1,172           |             |                          |                          |                         |
| Liver                 |                          |                          |                          |                          |                     |             |                          |                          |                         |
| Liver fat (%)         | 0.13 (2.56)              | -3.23 (4.57)             | -1.55 (2.58)             | -0.65 (1.92)             | 0.08 (1.95)         | 0.97 (2.37) | 1.99 (3.03)              | 3.45 (4.84)              | <0.001                  |
| Body composition      |                          |                          |                          |                          |                     |             |                          |                          |                         |
| VAT (%)               | 6 (24)                   | -38 (15)                 | -22 (13)                 | -7 (23)                  | 5 (13)              | 21 (19)     | 32 (23)                  | 58 (38)                  | <0.001                  |
| SAT (%)               | 2 (17)                   | -29 (12)                 | -17 (10)                 | -7 (9)                   | 2 (13)              | 12 (14)     | 20 (23)                  | 36 (21)                  | <0.001                  |
| Abdominal SM (%)      | -1.3 (3.5)               | -4.1 (4.7)               | -2.9 (3.4)               | -2.2 (3.3)               | -1.2 (3.3)          | -0.4 (3.2)  | 0.5 (3.8)                | 1.2 (3.9)                | <0.001                  |
| SMI (%)               | -1.0 (4.8)               | -3.5 (5.3)               | -2.6 (4.4)               | -1.9 (4.7)               | -1.0 (4.5)          | -0.3 (5.3)  | 0.6 (5.0)                | 1.6 (5.0)                | <0.001                  |
| MFI <sub>SM</sub> (%) | 2.5 (4.0)                | -3.7 (6.7)               | -0.5 (3.8)               | 1.0 (3.5)                | 2.6 (3.1)           | 4.1 (3.4)   | 5.6 (4.6)                | 7.6 (4.4)                | <0.001                  |
| Psoas CSA (c%)        | 0 (17)                   | -4 (18)                  | -4 (14)                  | -2 (18)                  | -1 (16)             | 1 (16)      | 4 (17)                   | 6 (35)                   | <0.001                  |

112

113 <sup>1</sup> Data are mean (SD) for relative % change.

114 <sup>2</sup> P values calculated using ANOVA test.

115 **Supplementary Table 3.** Relative change in MRI metrics in males whose weight remained stable, who lost weight or gained weight over the  
 116 follow-up period.

117

|                  | All        | 10-15%                   | 5-10%                    | 2-5%                     | Controls with              | 2-5%        | 5-10%                    | 10-15%                   | ANOVA p-                |
|------------------|------------|--------------------------|--------------------------|--------------------------|----------------------------|-------------|--------------------------|--------------------------|-------------------------|
| Change           | males      | weight loss <sup>1</sup> | weight loss <sup>1</sup> | weight loss <sup>1</sup> | stable weight <sup>1</sup> | weight gain | weight gain <sup>1</sup> | weight gain <sup>1</sup> | value across            |
|                  | N = 1,486  | N = 20                   | N = 123                  | N = 271                  | N = 683                    | N = 280     | N = 98                   | N = 11                   | all groups <sup>2</sup> |
| Liver            |            |                          |                          |                          |                            |             |                          |                          |                         |
| Liver fat (%)    | 7 (42)     | -41 (22)                 | -25 (23)                 | -9 (23)                  | 5 (29)                     | 25 (43)     | 62 (71)                  | 92 (74)                  | <0.001                  |
| Body composition |            |                          |                          |                          |                            |             |                          |                          |                         |
| VAT (%)          | 4 (24)     | -42 (16)                 | -24 (13)                 | -8 (28)                  | 4 (13)                     | 19 (16)     | 34 (25)                  | 51 (25)                  | <0.001                  |
| SAT (%)          | 2 (18)     | -32 (10)                 | -17 (9)                  | -7 (11)                  | 3 (16)                     | 13 (15)     | 22 (14)                  | 44 (22)                  | <0.001                  |
| Abdominal SM (%) | -1.3 (3.6) | -5.4 (5.5)               | -3.3 (3.6)               | -2.7 (3.2)               | -1.2 (3.4)                 | 0.1 (3.2)   | 1.0 (3.5)                | 2.8 (4.4)                | <0.001                  |
| SMI (%)          | -1.1 (4.6) | -4.9 (5.2)               | -2.9 (4.5)               | -2.4 (4.1)               | -1.1 (4.2)                 | 0.2 (4.9)   | 0.9 (5.0)                | 3.3 (5.9)                | <0.001                  |
| MFISM (%)        | 2.6 (4.1)  | -4.8 (9.8)               | -0.5 (3.7)               | 1.1 (3.6)                | 2.7 (3.4)                  | 4.2 (3.6)   | 5.7 (3.5)                | 7.8 (4.8)                | <0.001                  |
| Psoas CSA (%)    | -2 (14)    | -9 (19)                  | -5 (11)                  | -3 (15)                  | -2 (15)                    | 1 (15)      | 3 (14)                   | 1 (6)                    | <0.001                  |

118 <sup>1</sup> Data are mean (SD) for relative % change.

119 <sup>2</sup> P values calculated using ANOVA test.

120

121 **Supplementary Table 4.** Relative change in MRI metrics in females whose weight remained stable, who lost weight or gained weight over the  
 122 follow-up period.

123

|                  | All        | 10-15%                   | 5-10%                    | 2-5%                     | Controls with              | 2-5%        | 5-10%                    | 10-15%                   | ANOVA p-                |
|------------------|------------|--------------------------|--------------------------|--------------------------|----------------------------|-------------|--------------------------|--------------------------|-------------------------|
| Change           | females    | weight loss <sup>1</sup> | weight loss <sup>1</sup> | weight loss <sup>1</sup> | stable weight <sup>1</sup> | weight gain | weight gain <sup>1</sup> | weight gain <sup>1</sup> | value across            |
|                  | N = 1,543  | N = 35                   | N = 132                  | N = 267                  | N = 650                    | N = 297     | N = 129                  | N = 33                   | all groups <sup>2</sup> |
| Liver            |            |                          |                          |                          |                            |             |                          |                          |                         |
| Liver fat (%)    | 8 (37)     | -29 (32)                 | -16 (26)                 | -5 (25)                  | 6 (29)                     | 20 (39)     | 38 (48)                  | 65 (69)                  | <0.001                  |
| Body composition |            |                          |                          |                          |                            |             |                          |                          |                         |
| VAT (%)          | 7(23)      | -35 (14)                 | -20 (13)                 | -6 (11)                  | 6 (13)                     | 21 (20)     | 30 (21)                  | 60 (41)                  | <0.001                  |
| SAT (%)          | 2 (16)     | -28 (13)                 | -17 (11)                 | -6 (7)                   | 2 (7)                      | 11 (11)     | 18 (27)                  | 33 (20)                  | <0.001                  |
| Abdominal SM (%) | -1.4 (3.5) | -3.9 (4.4)               | -2.9 (3.4)               | -2.2 (3.3)               | -1.3 (3.3)                 | -0.9 (3.1)  | 0.2 (3.9)                | 0.6 (3.5)                | <0.001                  |
| SMI (%)          | -1.1 (4.9) | -3.3 (5.5)               | -2.5 (4.2)               | -1.8 (4.9)               | -1.1 (4.6)                 | -0.7 (5.4)  | 0.4 (4.8)                | 1.0 (4.6)                | <0.001                  |
| MFISM (%)        | 2.6 (3.8)  | -3.1 (3.5)               | -0.4 (3.8)               | 1.2 (3.3)                | 2.6 (2.9)                  | 3.9 (3.2)   | 5.6 (5.0)                | 7.5 (4.3)                | <0.001                  |
| Psoas CSA (%)    | 1 (19)     | -2 (15)                  | -4 (16)                  | 0 (20)                   | 0 (17)                     | 2 (17)      | 4 (21)                   | 7 (41)                   | <0.001                  |

124 <sup>1</sup> Data are mean (SD) for relative % change.

125 <sup>2</sup> P values calculated using ANOVA test.

126

**Supplementary Table 5.** Expected changes per each % weight reduction in individuals with overweight or obesity based on linear regression analysis.

| Change <sup>1</sup> | Slope Coefficient | P-value | R <sup>2</sup> |
|---------------------|-------------------|---------|----------------|
| Liver               |                   |         |                |
| Liver fat           | 4.7               | <0.001  | 0.27           |
| Body composition    |                   |         |                |
| VAT                 | 3.2               | <0.001  | 0.71           |
| SAT                 | 2.2               | <0.001  | 0.71           |
| Abdominal SM        | 0.31              | <0.001  | 0.20           |
| SMI                 | 0.29              | <0.001  | 0.09           |
| Psoas CSA           | 0.43              | <0.001  | 0.02           |

<sup>1</sup> Shown as % change in MRI measure for each % reduction in weight.

143

## 144 References

- 145 1 Nowak M, Nunez L, Hill CE, Pagliaro T, McGonnigle J, Niglas M *et al.* Automated  
146 volumetric MRI quantification of body fat and skeletal muscle in the UK Biobank: technical  
147 validation against expert manual segmentations and comparison with single-slice  
148 techniques. *Abdominal Radiology (NY)* 2025; **in press**.
- 149 2 Triplett WT, Baligand C, Forbes SC, Willcocks RJ, Lott DJ, DeVos S *et al.* Chemical shift-  
150 based MRI to measure fat fractions in dystrophic skeletal muscle. *Magn Reson Med* 2014;  
151 **72**: 8–19.
- 152 3 de Bazelaire CMJ, Duhamel GD, Rofsky NM, Alsop DC. MR imaging relaxation times of  
153 abdominal and pelvic tissues measured in vivo at 3.0 T: preliminary results. *Radiology*  
154 2004; **230**: 652–659.
- 155 4 Barral JK, Gudmundson E, Stikov N, Etezadi-Amoli M, Stoica P, Nishimura DG. A robust  
156 methodology for in vivo T1 mapping. *Magn Reson Med* 2010; **64**: 1057–1067.
- 157 5 Tustison NJ, Avants BB, Cook PA, Zheng Y, Egan A, Yushkevich PA *et al.* N4ITK:  
158 improved N3 bias correction. *IEEE Trans Med Imaging* 2010; **29**: 1310–1320.
- 159 6 Wasserthal J, Breit H-C, Meyer MT, Pradella M, Hinck D, Sauter AW *et al.*  
160 TotalSegmentator: Robust Segmentation of 104 Anatomic Structures in CT Images.  
161 *Radiology: Artificial Intelligence* 2023; **5**: e230024.
- 162 7 Xu W, Fu Y-L, Zhu D. ResNet and its application to medical image processing: Research  
163 progress and challenges. *Comput Methods Programs Biomed* 2023; **240**: 107660.

164

165
